# Supplementary material for: Δ-Machine learning-driven discovery of double hybrid organic–inorganic perovskites
Source: Royal Society of Chemistry journal article supplement (doi:10.1039/d1ta09911f), 2021-12-13
Supplement: d1ta09911f1.pdf [file d1ta09911f1.pdf]

**Supplementary information:  $\Delta$ -machine learning-driven discovery of double hybrid organic-inorganic perovskites**

Jialu Chen,<sup>1</sup> Wenjun Xu<sup>1</sup>, Ruiqin Zhang<sup>\*1,2</sup>

<sup>1</sup>Department of Physics, City University of Hong Kong, Hong Kong SAR, People's Republic of China

<sup>2</sup>Beijing Computational Science Research Center, Beijing 100193, People's Republic of China

\*Corresponding author.

Email address: [aprqz@cityu.edu.hk](mailto:aprqz@cityu.edu.hk)

Mean absolute error (MAE), mean squared error (MSE), and coefficient of determination ( $R^2$ ) were calculated to evaluate model accuracy. They are defined by Equations (S1), (S2), and (S4), correspondingly.  $\bar{y}$  denotes the average value for a dataset with samplings marked  $y_1, \dots, y_N$ , and  $f_1, \dots, f_N$  denote predicted values.

$$\text{MAE} = \frac{1}{N} \sum_{i=1}^N |y_i - f_i| \quad (\text{S1})$$

$$\text{MSE} = \frac{1}{N} \sum_{i=1}^N (y_i - f_i)^2 \quad (\text{S2})$$

$$\bar{y} = \frac{1}{N} \sum_{i=1}^N y_i \quad (\text{S3})$$

$$R^2 = 1 - \frac{\sum_{i=1}^N (y_i - f_i)^2}{\sum_{i=1}^N (y_i - \bar{y})^2} \quad (\text{S4})$$

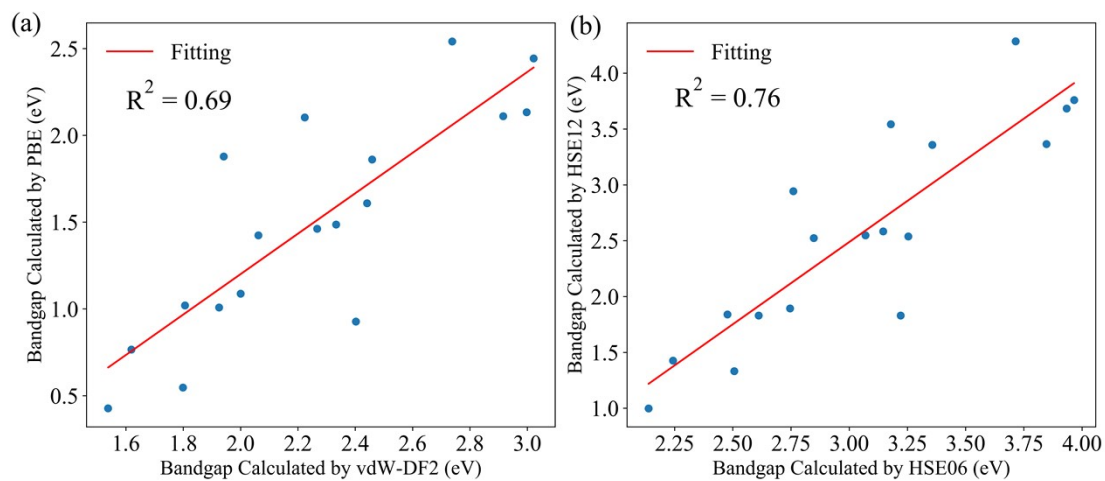

**Fig. S1.** Linear regression between bandgaps of vdW-DF2 and PBE (a), and between HSE06 and HSE12 (b). Bandgaps of PBE and HSE12 are from the first dataset, while vdW-DF2 and HSE06 are from the second dataset.

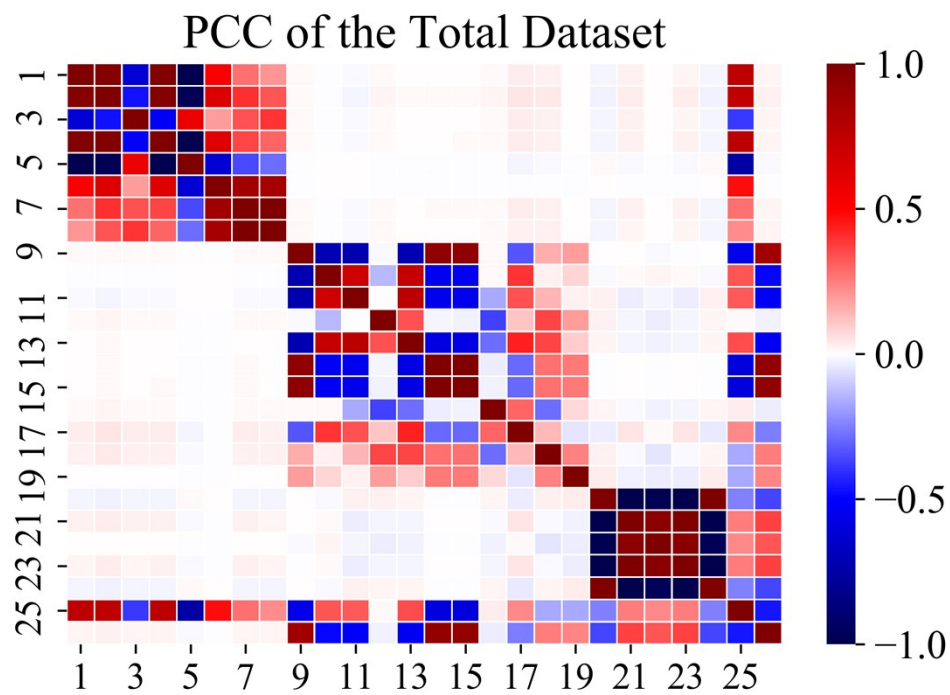

**Fig. S2.** The heat map of the Pearson correlation coefficient (PCC) matrix among 26 initial features of the total dataset.

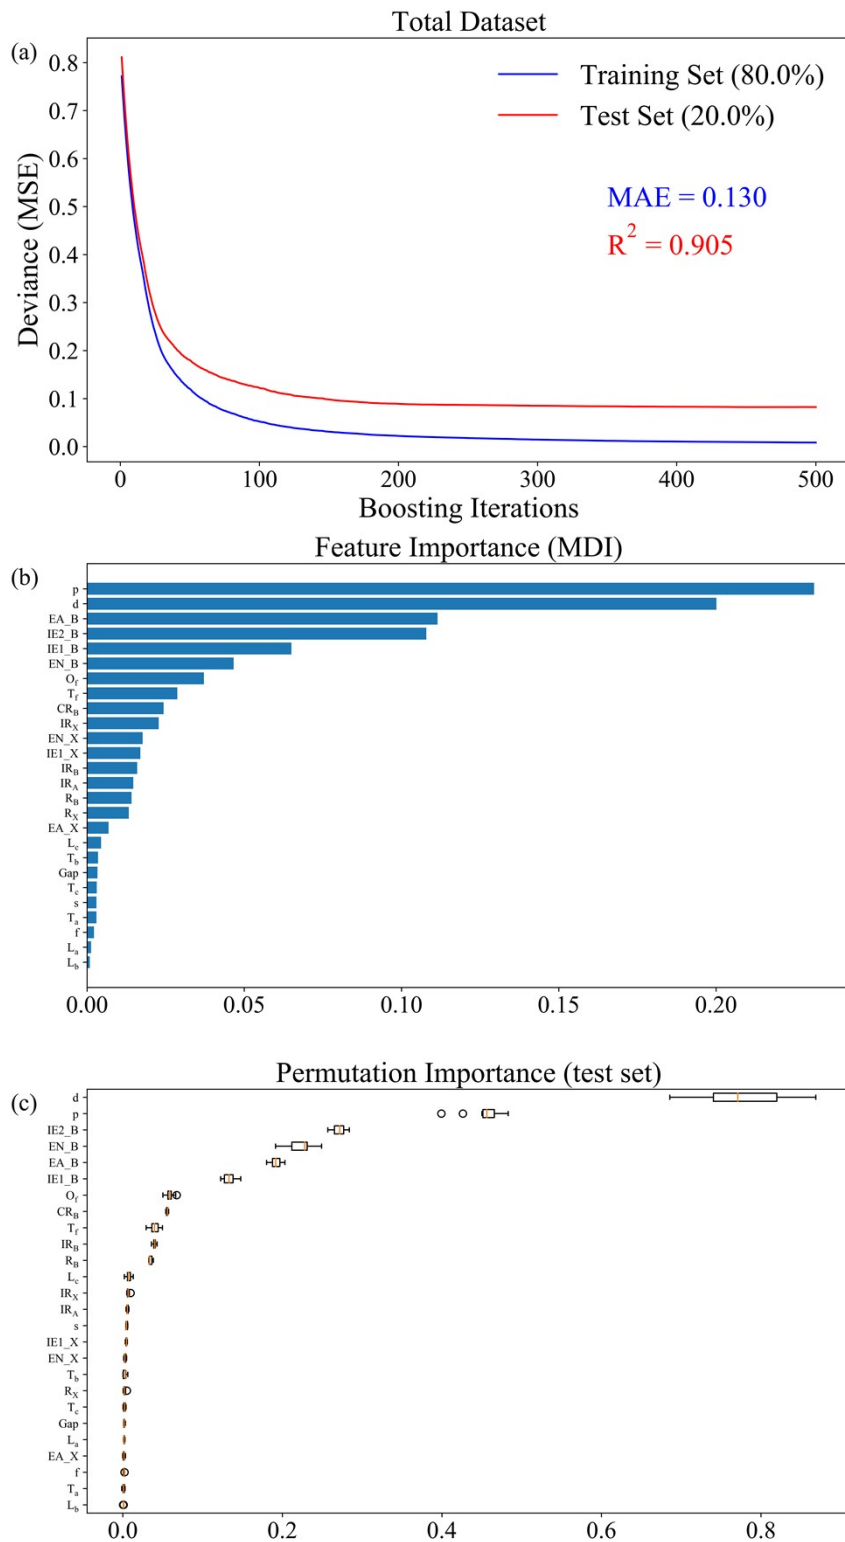

**Fig. S3.** The converge of model deviance, MDI, and permutation importance of the test set for the first model in Table S4.

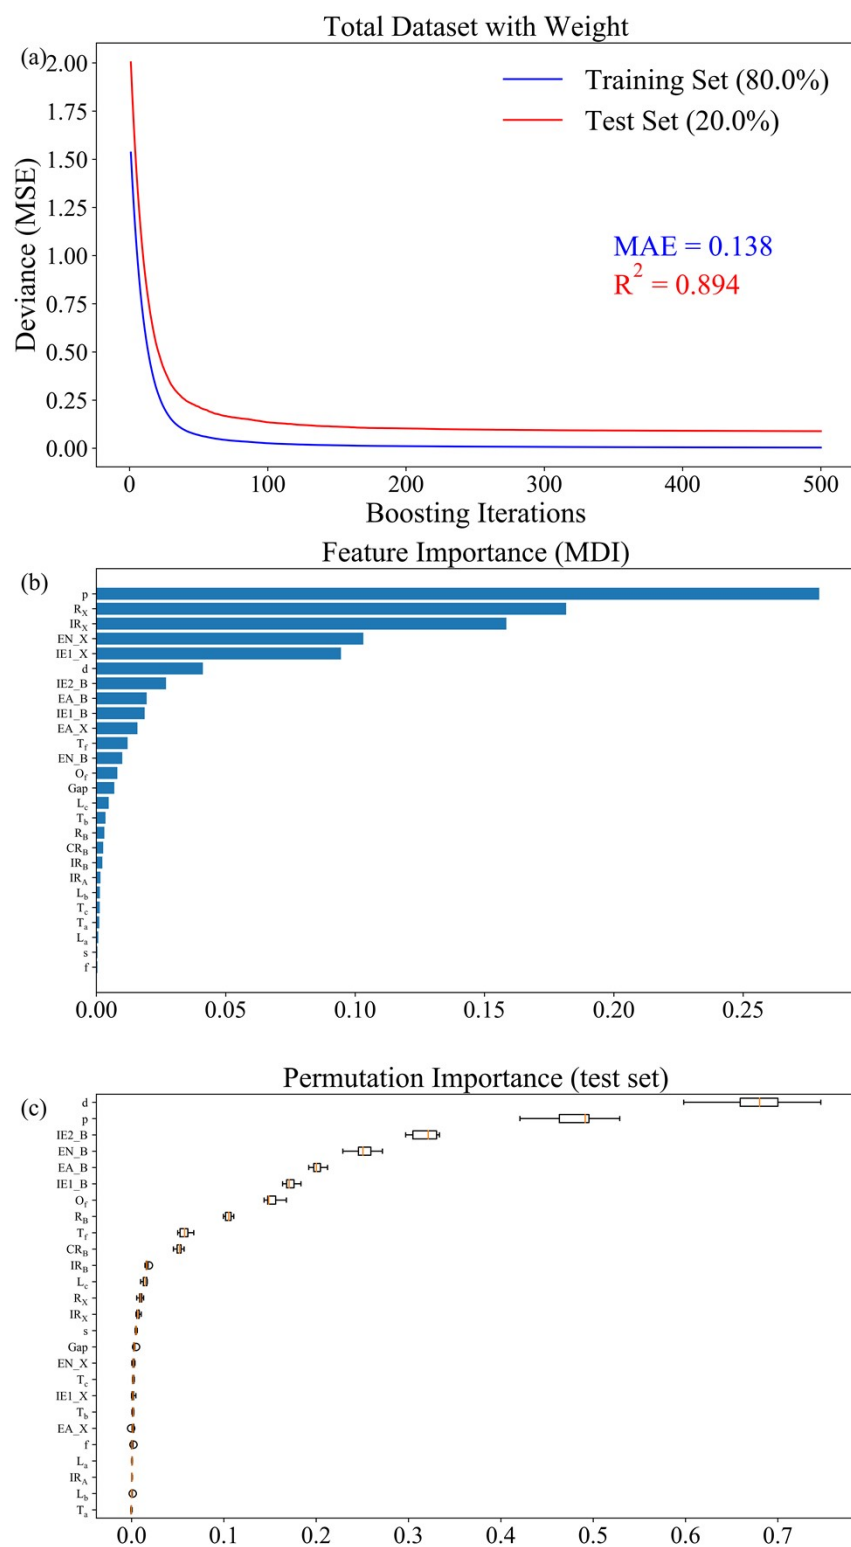

**Fig. S4.** The converge of model deviance, MDI, and permutation importance of the test set for the second model in Table S4, with a fitting weight of 100 for structures from the second dataset.

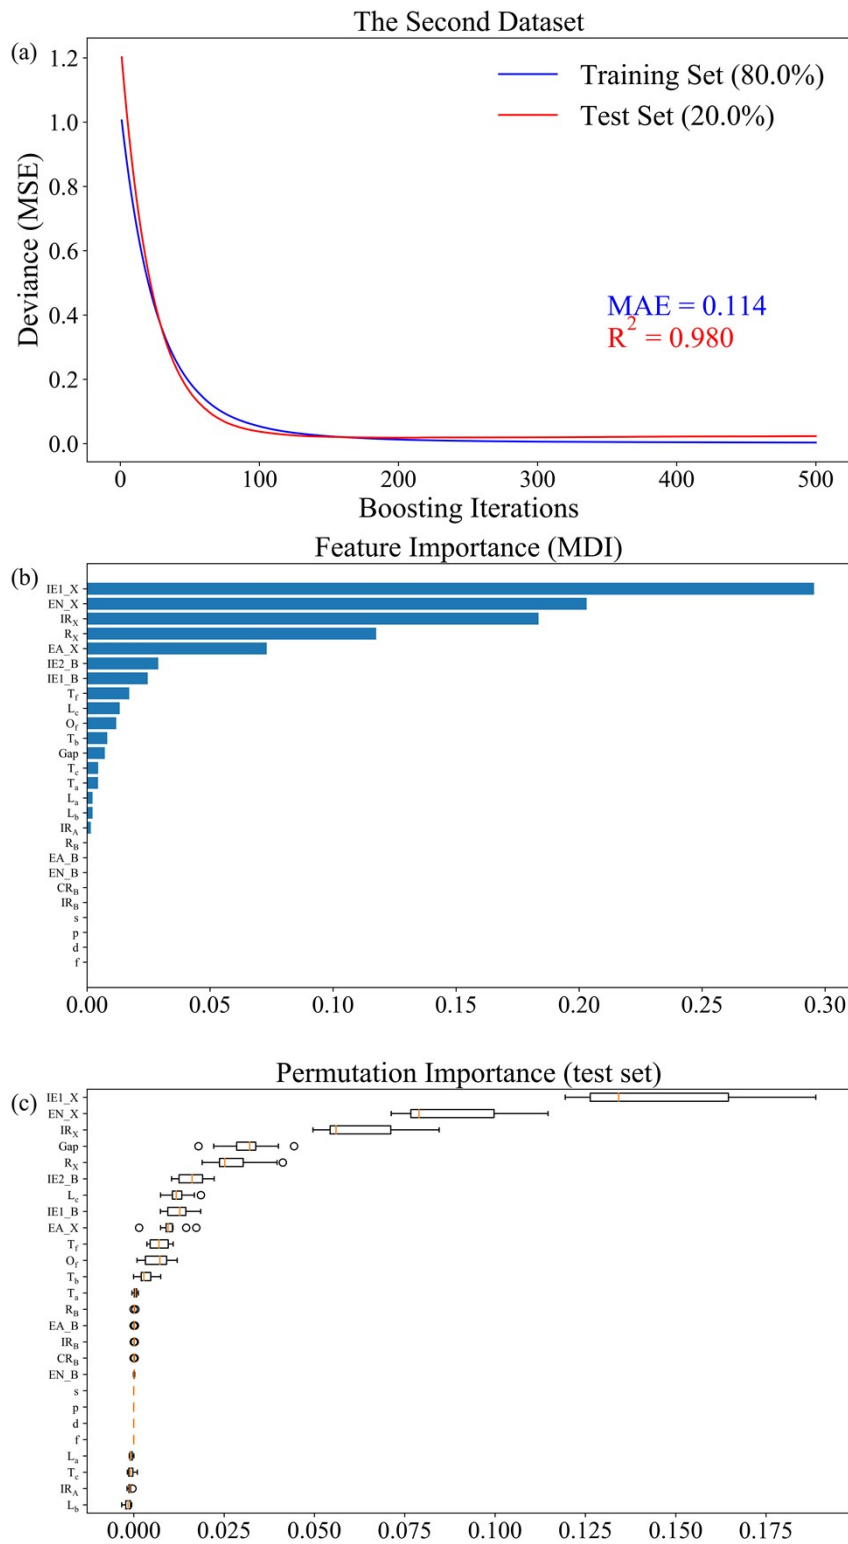

**Fig. S5.** The converge of model deviance, MDI, and permutation importance of test set for the third model in Table S4, by only fitting the second dataset.

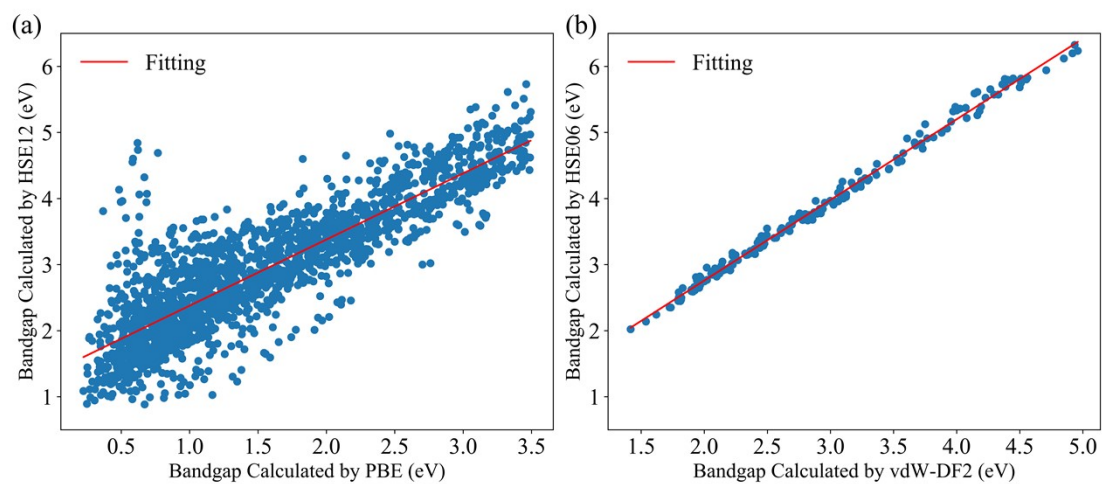

**Fig. S6.** Linear regression of bandgaps between PBE and HSE12 in the first dataset (a) and vdW-DF2 and HSE06 in the second dataset (b).



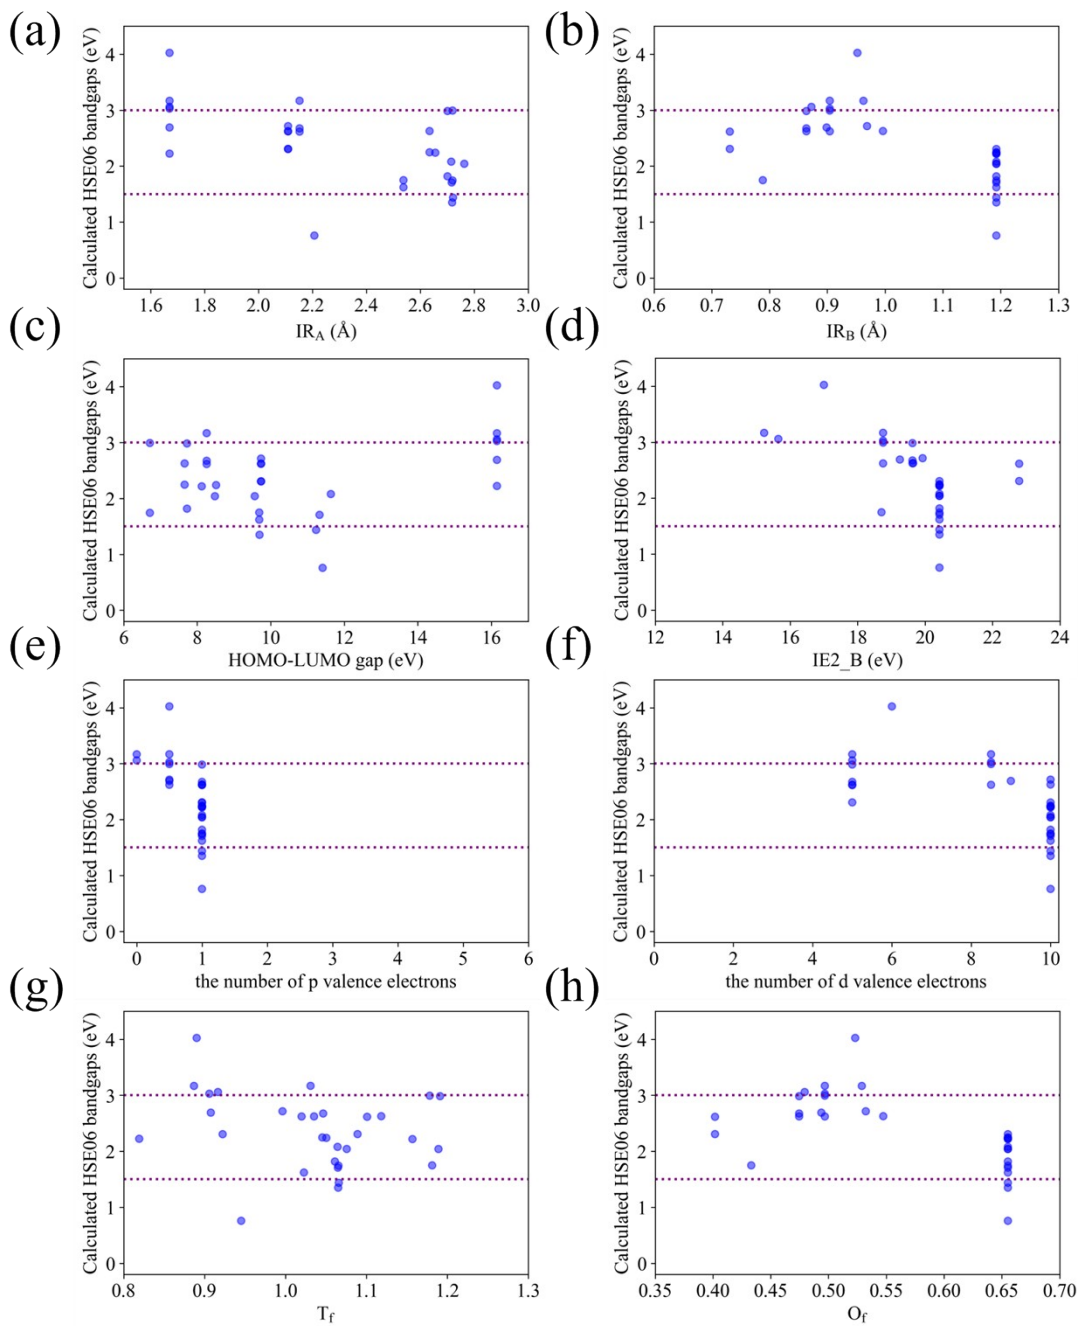

**Fig. S7.** Data visualization of HSE06 bandgaps of 24 screening DHOIPs with (a) effective radii of A-site cations, (b) average ionic radii of B-site atoms, (c) HOMO-LUMO gaps of A-site cations, (d) the second ionization energies of B-site atoms, (e) the number of p valence electrons, (f) the number of d valence electrons, (g) tolerance factor, and (h) octahedral factor.

**Table S1.** Comparison of calculated bandgaps (eV) of the same compositions in different datasets. The bandgaps of the second dataset are averaged by the same compositions.

| Formula                                             | The first dataset |       | The second dataset |       |
|-----------------------------------------------------|-------------------|-------|--------------------|-------|
|                                                     | PBE               | HSE   | vdw-DF2            | HSE   |
| CH <sub>3</sub> NH <sub>3</sub> GeCl <sub>3</sub>   | 2.443             | 3.683 | 3.022              | 3.934 |
| CH <sub>3</sub> NH <sub>3</sub> GeBr <sub>3</sub>   | 1.486             | 2.583 | 2.333              | 3.146 |
| CH <sub>3</sub> NH <sub>3</sub> GeI <sub>3</sub>    | 1.008             | 1.830 | 1.925              | 2.611 |
| CH <sub>3</sub> NH <sub>3</sub> SnCl <sub>3</sub>   | 1.609             | 2.538 | 2.441              | 3.254 |
| CH <sub>3</sub> NH <sub>3</sub> SnBr <sub>3</sub>   | 1.088             | 1.894 | 2.000              | 2.746 |
| CH <sub>3</sub> NH <sub>3</sub> SnI <sub>3</sub>    | 0.766             | 1.426 | 1.619              | 2.243 |
| CH <sub>3</sub> NH <sub>3</sub> PbCl <sub>3</sub>   | 2.133             | 3.759 | 2.998              | 3.966 |
| CH <sub>3</sub> NH <sub>3</sub> PbBr <sub>3</sub>   | 1.861             | 3.358 | 2.459              | 3.357 |
| CH <sub>3</sub> NH <sub>3</sub> PbI <sub>3</sub>    | 1.424             | 2.524 | 2.062              | 2.848 |
| HC(NH <sub>2</sub> ) <sub>2</sub> GeCl <sub>3</sub> | 2.110             | 3.365 | 2.916              | 3.847 |
| HC(NH <sub>2</sub> ) <sub>2</sub> GeBr <sub>3</sub> | 1.462             | 2.548 | 2.267              | 3.070 |
| HC(NH <sub>2</sub> ) <sub>2</sub> GeI <sub>3</sub>  | 1.020             | 1.840 | 1.806              | 2.477 |
| HC(NH <sub>2</sub> ) <sub>2</sub> SnCl <sub>3</sub> | 0.927             | 1.830 | 2.402              | 3.221 |
| HC(NH <sub>2</sub> ) <sub>2</sub> SnBr <sub>3</sub> | 0.547             | 1.332 | 1.799              | 2.506 |
| HC(NH <sub>2</sub> ) <sub>2</sub> SnI <sub>3</sub>  | 0.427             | 0.998 | 1.538              | 2.138 |
| HC(NH <sub>2</sub> ) <sub>2</sub> PbCl <sub>3</sub> | 2.541             | 4.285 | 2.738              | 3.715 |
| HC(NH <sub>2</sub> ) <sub>2</sub> PbBr <sub>3</sub> | 2.103             | 3.543 | 2.224              | 3.179 |
| HC(NH <sub>2</sub> ) <sub>2</sub> PbI <sub>3</sub>  | 1.878             | 2.943 | 1.941              | 2.760 |

**Table S2.** Properties of A-site cations including the identification N of organic cations (1~16) or atomic number (N > 16) in this work, Gap (eV), the HOMO-LUMO gap, three lengths  $L_a$ ,  $L_b$  and  $L_c$ , and radius ( $\text{\AA}$ ), and rotational temperatures (K) in three directions  $T_a$ ,  $T_b$ , and  $T_c$ .

| N  | Formula                                                     | $L_a$ | $L_b$ | $L_c$ | Radius | Gap    | $T_a$ | $T_b$ | $T_c$ |
|----|-------------------------------------------------------------|-------|-------|-------|--------|--------|-------|-------|-------|
| 1  | $\text{NH}_4^+$                                             | 3.943 | 3.940 | 3.687 | 2.037  | 16.152 | 8.586 | 8.586 | 8.586 |
| 2  | $\text{CH}_3\text{NH}_3^+$                                  | 4.628 | 4.385 | 4.187 | 2.692  | 11.413 | 4.067 | 0.959 | 0.959 |
| 3  | $(\text{CH}_3)_2\text{NH}_2^+$                              | 6.637 | 4.457 | 4.184 | 3.319  | 11.235 | 1.447 | 0.415 | 0.367 |
| 4  | $(\text{CH}_3)_3\text{NH}^+$                                | 6.592 | 6.298 | 4.953 | 3.313  | 11.329 | 0.388 | 0.388 | 0.225 |
| 5  | $(\text{CH}_3)_4\text{N}^+$                                 | 6.550 | 6.337 | 6.099 | 3.311  | 11.636 | 0.223 | 0.223 | 0.223 |
| 6  | $\text{CH}_3\text{CH}_2\text{NH}_3^+$                       | 6.630 | 4.545 | 4.180 | 3.315  | 9.697  | 1.415 | 0.399 | 0.353 |
| 7  | $\text{CH}_3\text{CH}_2\text{CH}_2\text{NH}_3^+$            | 7.784 | 4.726 | 4.172 | 3.959  | 8.483  | 1.127 | 0.170 | 0.160 |
| 8  | $(\text{CH}_3)_2\text{CHNH}_3^+$                            | 6.650 | 6.406 | 5.073 | 3.370  | 9.567  | 0.369 | 0.369 | 0.213 |
| 9  | $\text{CH}_3\text{CH}_2\text{CH}_2\text{CH}_2\text{NH}_3^+$ | 7.581 | 5.605 | 5.356 | 3.792  | 8.125  | 0.359 | 0.141 | 0.127 |
| 10 | $\text{OHNH}_3^+$                                           | 4.511 | 4.211 | 4.091 | 2.573  | 9.738  | 6.687 | 1.178 | 1.137 |
| 11 | $\text{HC}(\text{NH}_2)_2^+$                                | 6.425 | 5.093 | 2.900 | 3.213  | 7.659  | 2.877 | 0.493 | 0.421 |
| 12 | $\text{CH}_3\text{C}(\text{NH}_2)_2^+$                      | 6.428 | 6.014 | 4.167 | 3.294  | 7.724  | 0.474 | 0.432 | 0.233 |
| 13 | $\text{NH}_2\text{NH}_3^+$                                  | 4.593 | 4.060 | 3.851 | 2.625  | 8.259  | 5.321 | 1.092 | 1.048 |
| 14 | $\text{C}(\text{NH}_2)_3^+$                                 | 6.359 | 6.315 | 2.400 | 3.239  | 8.515  | 0.486 | 0.486 | 0.243 |
| 15 | $\text{C}_3\text{H}_8\text{N}^+$                            | 6.111 | 6.103 | 4.550 | 3.095  | 9.689  | 0.528 | 0.496 | 0.297 |
| 16 | $\text{C}_3\text{H}_5\text{N}_2^+$                          | 6.451 | 6.403 | 2.400 | 3.317  | 6.714  | 0.449 | 0.439 | 0.222 |
| 55 | $\text{Cs}^+$                                               | 3.620 | 3.620 | 3.620 | 1.810  | 14.566 | 0.000 | 0.000 | 0.000 |

**Table S3.** Effective radii (Å) by Kieslich et al., initial radius (Å) calculated by Multwfn, and scaled ionic radii (Å) with a factor of 0.82 for organic cations.

| N  | Formula                                                                                      | Kieslich et al. | Initial Radius | Scaled Radius |
|----|----------------------------------------------------------------------------------------------|-----------------|----------------|---------------|
| 1  | NH <sub>4</sub> <sup>+</sup>                                                                 | 1.46            | 2.037          | 1.670         |
| 2  | CH <sub>3</sub> NH <sub>3</sub> <sup>+</sup>                                                 | 2.17            | 2.692          | 2.207         |
| 3  | (CH <sub>3</sub> ) <sub>2</sub> NH <sub>2</sub> <sup>+</sup>                                 | 2.72            | 3.319          | 2.722         |
| 4  | (CH <sub>3</sub> ) <sub>3</sub> NH <sup>+</sup>                                              |                 | 3.313          | 2.717         |
| 5  | (CH <sub>3</sub> ) <sub>4</sub> N <sup>+</sup>                                               | 2.92            | 3.311          | 2.715         |
| 6  | CH <sub>3</sub> CH <sub>2</sub> NH <sub>3</sub> <sup>+</sup>                                 |                 | 3.315          | 2.718         |
| 7  | CH <sub>3</sub> CH <sub>2</sub> CH <sub>2</sub> NH <sub>3</sub> <sup>+</sup>                 |                 | 3.959          | 3.246         |
| 8  | (CH <sub>3</sub> ) <sub>2</sub> CHNH <sub>3</sub> <sup>+</sup>                               |                 | 3.370          | 2.763         |
| 9  | CH <sub>3</sub> CH <sub>2</sub> CH <sub>2</sub> CH <sub>2</sub> NH <sub>3</sub> <sup>+</sup> |                 | 3.792          | 3.109         |
| 10 | OHNH <sub>3</sub> <sup>+</sup>                                                               | 2.16            | 2.573          | 2.110         |
| 11 | HC(NH <sub>2</sub> ) <sub>2</sub> <sup>+</sup>                                               | 2.53            | 3.213          | 2.635         |
| 12 | CH <sub>3</sub> C(NH <sub>2</sub> ) <sub>2</sub> <sup>+</sup>                                |                 | 3.294          | 2.701         |
| 13 | NH <sub>2</sub> NH <sub>3</sub> <sup>+</sup>                                                 | 2.17            | 2.625          | 2.153         |
| 14 | C(NH <sub>2</sub> ) <sub>3</sub> <sup>+</sup>                                                | 2.78            | 3.239          | 2.656         |
| 15 | C <sub>3</sub> H <sub>8</sub> N <sup>+</sup>                                                 | 2.50            | 3.095          | 2.538         |
| 16 | C <sub>3</sub> H <sub>5</sub> N <sub>2</sub> <sup>+</sup>                                    | 2.58            | 3.317          | 2.720         |

**Table S4.** The data and hyperparameters of GBR models during the feature selection process.

|                                | 1     | 2     | 3      |
|--------------------------------|-------|-------|--------|
| Dataset                        | Total | Total | Second |
| Weight                         | No    | Yes   | No     |
| Boosting stages                | 500   | 500   | 500    |
| Learning rate                  | 0.05  | 0.05  | 0.02   |
| Maximum depth of nodes         | 8     | 8     | 3      |
| Minimum number to split a node | 3     | 3     | 8      |
| Training set size              | 80%   | 80%   | 80%    |

**Table S5.** The data and hyperparameters of GBR models after the feature selection process.

|                                | Model1 | Model2 | Model3 | Model4 | Model5 |
|--------------------------------|--------|--------|--------|--------|--------|
| Dataset                        | Second | Second | Total  | Total  | Total  |
| Weight                         | No     | No     | Yes    | Yes    | Yes    |
| Boosting stages                | 500    | 500    | 500    | 500    | 500    |
| Learning rate                  | 0.02   | 0.02   | 0.05   | 0.03   | 0.03   |
| Maximum depth of nodes         | 3      | 3      | 8      | 7      | 7      |
| Minimum number to split a node | 8      | 8      | 3      | 4      | 4      |
| Training set size              | 20%    | 20%    | 80%    | 80%    | 80%    |

**Table S6.** Common valences of cations in B-site in the range of +1 to +3.

| Atomic number | Chemical symbol | Valences |
|---------------|-----------------|----------|
| 4             | Be              | 2        |
| 5             | B               | 3        |
| 6             | C               |          |
| 7             | N               | 3        |
| 12            | Mg              | 2        |
| 13            | Al              | 3        |
| 14            | Si              |          |
| 15            | P               | 3        |
| 20            | Ca              | 2        |
| 21            | Sc              | 3        |
| 22            | Ti              | 2 3      |
| 23            | V               | 2 3      |
| 24            | Cr              | 2 3      |
| 25            | Mn              | 2 3      |
| 26            | Fe              | 2 3      |
| 27            | Co              | 2 3      |
| 28            | Ni              | 2 3      |
| 29            | Cu              | 1 2 3    |
| 30            | Zn              | 2        |
| 31            | Ga              | 3        |
| 32            | Ge              | 2        |
| 33            | As              | 3        |
| 38            | Sr              | 2        |
| 39            | Y               | 3        |
| 40            | Zr              |          |
| 41            | Nb              | 3        |
| 42            | Mo              | 3        |
| 43            | Tc              |          |
| 44            | Ru              | 3        |
| 45            | Rh              | 3        |
| 46            | Pd              | 1 2 3    |
| 47            | Ag              | 1 2 3    |
| 48            | Cd              | 2        |
| 49            | In              | 3        |
| 50            | Sn              |          |
| 51            | Sb              | 3        |
| 56            | Ba              | 2        |
| 72            | Hf              |          |
| 73            | Ta              | 3        |
| 74            | W               |          |
| 75            | Re              |          |
| 76            | Os              |          |
| 77            | Ir              | 3        |
| 78            | Pt              | 2        |
| 79            | Au              | 1 3      |
| 80            | Hg              | 1 2      |
| 81            | Tl              | 1 3      |
| 82            | Pb              | 2        |
| 83            | Bi              | 3        |

**Table S7.** Calculated bandgaps of screening perovskites by our machine learning models. The bandgaps are not available for structures with failed convergence.

| Identification | A                                                            | B  | B' | EPBE | EHSE06 |
|----------------|--------------------------------------------------------------|----|----|------|--------|
| 1              | NH <sub>4</sub> <sup>+</sup>                                 | B  | Tl | 3.77 | /      |
| 2              | NH <sub>4</sub> <sup>+</sup>                                 | Mg | Ag | 0.07 | /      |
| 3              | NH <sub>4</sub> <sup>+</sup>                                 | Al | Tl | 3.89 | /      |
| 4              | NH <sub>4</sub> <sup>+</sup>                                 | Ca | Ge | 3.24 | /      |
| 5              | NH <sub>4</sub> <sup>+</sup>                                 | Ca | Pd | 1.38 | 3.06   |
| 6              | NH <sub>4</sub> <sup>+</sup>                                 | Sc | Tl | 3.0  | /      |
| 7              | NH <sub>4</sub> <sup>+</sup>                                 | Ti | Tl | /    | /      |
| 8              | NH <sub>4</sub> <sup>+</sup>                                 | V  | Tl | 0.0  | /      |
| 9              | NH <sub>4</sub> <sup>+</sup>                                 | Mn | Tl | 0.0  | /      |
| 10             | NH <sub>4</sub> <sup>+</sup>                                 | Fe | Tl | 0.0  | /      |
| 11             | NH <sub>4</sub> <sup>+</sup>                                 | Co | Tl | 0.92 | 3.03   |
| 12             | NH <sub>4</sub> <sup>+</sup>                                 | Ni | Tl | 0.0  | /      |
| 13             | NH <sub>4</sub> <sup>+</sup>                                 | Ga | Tl | 2.86 | /      |
| 14             | NH <sub>4</sub> <sup>+</sup>                                 | Ge | Sr | 3.25 | /      |
| 15             | NH <sub>4</sub> <sup>+</sup>                                 | Ge | Ba | 3.35 | /      |
| 16             | NH <sub>4</sub> <sup>+</sup>                                 | Sr | Pd | 1.56 | 3.17   |
| 17             | NH <sub>4</sub> <sup>+</sup>                                 | Nb | Tl | 0.0  | /      |
| 18             | NH <sub>4</sub> <sup>+</sup>                                 | Mo | Tl | 0.0  | /      |
| 19             | NH <sub>4</sub> <sup>+</sup>                                 | Ru | Tl | 0.0  | /      |
| 20             | NH <sub>4</sub> <sup>+</sup>                                 | Rh | Tl | 1.15 | 2.69   |
| 21             | NH <sub>4</sub> <sup>+</sup>                                 | Pd | Tl | 0.0  | /      |
| 22             | NH <sub>4</sub> <sup>+</sup>                                 | In | Tl | 2.35 | /      |
| 23             | NH <sub>4</sub> <sup>+</sup>                                 | Ta | Tl | 0.0  | /      |
| 24             | NH <sub>4</sub> <sup>+</sup>                                 | Tl | Tl | 1.4  | 2.22   |
| 25             | CH <sub>3</sub> NH <sub>3</sub> <sup>+</sup>                 | B  | Tl | 2.33 | /      |
| 26             | CH <sub>3</sub> NH <sub>3</sub> <sup>+</sup>                 | Al | Tl | 3.71 | /      |
| 27             | CH <sub>3</sub> NH <sub>3</sub> <sup>+</sup>                 | Ca | Ge | 3.13 | /      |
| 28             | CH <sub>3</sub> NH <sub>3</sub> <sup>+</sup>                 | Co | Tl | 0.83 | 3.03   |
| 29             | CH <sub>3</sub> NH <sub>3</sub> <sup>+</sup>                 | Ga | Tl | 2.96 | /      |
| 30             | CH <sub>3</sub> NH <sub>3</sub> <sup>+</sup>                 | Ge | Sr | 3.47 | /      |
| 31             | CH <sub>3</sub> NH <sub>3</sub> <sup>+</sup>                 | Ge | Ba | 3.48 | /      |
| 32             | CH <sub>3</sub> NH <sub>3</sub> <sup>+</sup>                 | In | Tl | 2.43 | /      |
| 33             | CH <sub>3</sub> NH <sub>3</sub> <sup>+</sup>                 | Tl | Tl | 0.23 | 0.76   |
| 34             | (CH <sub>3</sub> ) <sub>2</sub> NH <sub>2</sub> <sup>+</sup> | Al | Tl | 3.17 | /      |
| 35             | (CH <sub>3</sub> ) <sub>2</sub> NH <sub>2</sub> <sup>+</sup> | Ga | Tl | 2.94 | /      |
| 36             | (CH <sub>3</sub> ) <sub>2</sub> NH <sub>2</sub> <sup>+</sup> | Ge | Sr | 3.47 | /      |
| 37             | (CH <sub>3</sub> ) <sub>2</sub> NH <sub>2</sub> <sup>+</sup> | Ge | Ba | 3.36 | /      |
| 38             | (CH <sub>3</sub> ) <sub>2</sub> NH <sub>2</sub> <sup>+</sup> | In | Tl | 2.43 | /      |
| 39             | (CH <sub>3</sub> ) <sub>2</sub> NH <sub>2</sub> <sup>+</sup> | Tl | Tl | 0.77 | 1.44   |
| 40             | (CH <sub>3</sub> ) <sub>3</sub> NH <sup>+</sup>              | Al | Tl | 3.63 | /      |
| 41             | (CH <sub>3</sub> ) <sub>3</sub> NH <sup>+</sup>              | Ga | Tl | 2.63 | /      |
| 42             | (CH <sub>3</sub> ) <sub>3</sub> NH <sup>+</sup>              | Ge | Sr | 3.14 | /      |
| 43             | (CH <sub>3</sub> ) <sub>3</sub> NH <sup>+</sup>              | Ge | Ba | 3.27 | /      |
| 44             | (CH <sub>3</sub> ) <sub>3</sub> NH <sup>+</sup>              | In | Tl | 2.44 | /      |
| 45             | (CH <sub>3</sub> ) <sub>3</sub> NH <sup>+</sup>              | Tl | Tl | 0.94 | 1.71   |

|    |                                                             |    |    |      |      |
|----|-------------------------------------------------------------|----|----|------|------|
| 46 | $(\text{CH}_3)_4\text{N}^+$                                 | Al | Tl | 3.13 | /    |
| 47 | $(\text{CH}_3)_4\text{N}^+$                                 | Ga | Tl | 2.54 | /    |
| 48 | $(\text{CH}_3)_4\text{N}^+$                                 | Ge | Sr | 3.17 | /    |
| 49 | $(\text{CH}_3)_4\text{N}^+$                                 | Ge | Ba | 3.01 | /    |
| 50 | $(\text{CH}_3)_4\text{N}^+$                                 | In | Tl | 2.0  | /    |
| 51 | $(\text{CH}_3)_4\text{N}^+$                                 | Tl | Tl | 1.17 | 2.08 |
| 52 | $\text{CH}_3\text{CH}_2\text{NH}_3^+$                       | Al | Tl | 3.67 | /    |
| 53 | $\text{CH}_3\text{CH}_2\text{NH}_3^+$                       | Ga | Tl | 2.88 | /    |
| 54 | $\text{CH}_3\text{CH}_2\text{NH}_3^+$                       | Ge | Sr | 3.36 | /    |
| 55 | $\text{CH}_3\text{CH}_2\text{NH}_3^+$                       | Ge | Ba | 3.42 | /    |
| 56 | $\text{CH}_3\text{CH}_2\text{NH}_3^+$                       | In | Tl | 2.34 | /    |
| 57 | $\text{CH}_3\text{CH}_2\text{NH}_3^+$                       | Tl | Tl | /    | /    |
| 58 | $\text{CH}_3\text{CH}_2\text{NH}_3^+$                       | Tl | Tl | 1.2  | 2.04 |
| 59 | $(\text{CH}_3)_2\text{CHNH}_3^+$                            | Ga | Tl | 2.96 | /    |
| 60 | $(\text{CH}_3)_2\text{CHNH}_3^+$                            | Ge | Sr | 3.47 | /    |
| 61 | $(\text{CH}_3)_2\text{CHNH}_3^+$                            | Ge | Ba | 3.43 | /    |
| 62 | $(\text{CH}_3)_2\text{CHNH}_3^+$                            | In | Tl | 2.51 | /    |
| 63 | $(\text{CH}_3)_2\text{CHNH}_3^+$                            | Tl | Tl | 1.19 | 2.04 |
| 64 | $\text{CH}_3\text{CH}_2\text{CH}_2\text{CH}_2\text{NH}_3^+$ | Tl | Tl | 1.33 | 2.22 |
| 65 | $\text{OHNH}_3^+$                                           | B  | Tl | /    | /    |
| 66 | $\text{OHNH}_3^+$                                           | Al | Tl | /    | /    |
| 67 | $\text{OHNH}_3^+$                                           | Ca | Ge | 3.36 | /    |
| 68 | $\text{OHNH}_3^+$                                           | Co | Tl | /    | /    |
| 69 | $\text{OHNH}_3^+$                                           | Ga | Tl | 3.24 | /    |
| 70 | $\text{OHNH}_3^+$                                           | Ge | Sr | 3.57 | /    |
| 71 | $\text{OHNH}_3^+$                                           | Ge | Ba | 3.25 | /    |
| 72 | $\text{OHNH}_3^+$                                           | Pd | Tl | /    | /    |
| 73 | $\text{OHNH}_3^+$                                           | In | Tl | 2.54 | /    |
| 74 | $\text{OHNH}_3^+$                                           | Tl | Tl | 1.36 | 2.3  |
| 75 | $\text{HC}(\text{NH}_2)_2^+$                                | Al | Tl | 3.61 | /    |
| 76 | $\text{HC}(\text{NH}_2)_2^+$                                | Ca | Ge | 3.21 | /    |
| 77 | $\text{HC}(\text{NH}_2)_2^+$                                | Ga | Tl | 2.91 | /    |
| 78 | $\text{HC}(\text{NH}_2)_2^+$                                | Ge | Sr | 3.35 | /    |
| 79 | $\text{HC}(\text{NH}_2)_2^+$                                | Ge | Ba | 3.11 | /    |
| 80 | $\text{HC}(\text{NH}_2)_2^+$                                | In | Tl | 1.72 | 2.63 |
| 81 | $\text{HC}(\text{NH}_2)_2^+$                                | Tl | Tl | 1.41 | 2.25 |
| 82 | $\text{CH}_3\text{C}(\text{NH}_2)_2^+$                      | Al | Tl | /    | /    |
| 83 | $\text{CH}_3\text{C}(\text{NH}_2)_2^+$                      | Ga | Tl | 2.99 | /    |
| 84 | $\text{CH}_3\text{C}(\text{NH}_2)_2^+$                      | Ge | Sr | 3.54 | /    |
| 85 | $\text{CH}_3\text{C}(\text{NH}_2)_2^+$                      | Ge | Ba | 3.48 | /    |
| 86 | $\text{CH}_3\text{C}(\text{NH}_2)_2^+$                      | In | Tl | 2.46 | /    |
| 87 | $\text{CH}_3\text{C}(\text{NH}_2)_2^+$                      | Tl | Tl | 1.07 | 1.82 |
| 88 | $\text{NH}_2\text{NH}_3^+$                                  | B  | Tl | /    | /    |
| 89 | $\text{NH}_2\text{NH}_3^+$                                  | Al | Tl | 1.32 | 2.67 |
| 90 | $\text{NH}_2\text{NH}_3^+$                                  | Ca | Ge | 3.22 | /    |
| 91 | $\text{NH}_2\text{NH}_3^+$                                  | Co | Tl | 0.95 | 3.17 |
| 92 | $\text{NH}_2\text{NH}_3^+$                                  | Ga | Tl | 2.85 | /    |
| 93 | $\text{NH}_2\text{NH}_3^+$                                  | Ge | Sr | 2.99 | /    |
| 94 | $\text{NH}_2\text{NH}_3^+$                                  | Ge | Ba | 3.17 | /    |



|     |                                    |    |    |      |      |
|-----|------------------------------------|----|----|------|------|
| 95  | $\text{NH}_2\text{NH}_3^+$         | In | Tl | 2.47 | /    |
| 96  | $\text{NH}_2\text{NH}_3^+$         | Tl | Tl | 2.47 | /    |
| 97  | $\text{C}(\text{NH}_2)_3^+$        | Al | Tl | 2.82 | /    |
| 98  | $\text{C}(\text{NH}_2)_3^+$        | Ga | Tl | 2.92 | /    |
| 99  | $\text{C}(\text{NH}_2)_3^+$        | Ge | Sr | 3.43 | /    |
| 100 | $\text{C}(\text{NH}_2)_3^+$        | Ge | Ba | 3.54 | /    |
| 101 | $\text{C}(\text{NH}_2)_3^+$        | In | Tl | 2.54 | /    |
| 102 | $\text{C}(\text{NH}_2)_3^+$        | Tl | Tl | 1.4  | 2.24 |
| 103 | $\text{C}_3\text{H}_8\text{N}^+$   | Al | Tl | 3.37 | /    |
| 104 | $\text{C}_3\text{H}_8\text{N}^+$   | Ca | Ge | 3.2  | /    |
| 105 | $\text{C}_3\text{H}_8\text{N}^+$   | Ga | Tl | 2.49 | /    |
| 106 | $\text{C}_3\text{H}_8\text{N}^+$   | Ge | Sr | 3.39 | /    |
| 107 | $\text{C}_3\text{H}_8\text{N}^+$   | Ge | Ag | 0.86 | 1.75 |
| 108 | $\text{C}_3\text{H}_8\text{N}^+$   | Ge | Ba | 3.25 | /    |
| 109 | $\text{C}_3\text{H}_8\text{N}^+$   | In | Tl | 2.02 | /    |
| 110 | $\text{C}_3\text{H}_8\text{N}^+$   | Tl | Tl | 0.88 | 1.62 |
| 111 | $\text{C}_3\text{H}_5\text{N}_2^+$ | Al | Tl | 2.78 | /    |
| 112 | $\text{C}_3\text{H}_5\text{N}_2^+$ | Co | Tl | 0.86 | 2.99 |
| 113 | $\text{C}_3\text{H}_5\text{N}_2^+$ | Ga | Tl | 2.9  | /    |
| 114 | $\text{C}_3\text{H}_5\text{N}_2^+$ | Ge | Sr | 3.19 | /    |
| 115 | $\text{C}_3\text{H}_5\text{N}_2^+$ | Ge | Ba | 3.2  | /    |
| 116 | $\text{C}_3\text{H}_5\text{N}_2^+$ | In | Tl | 2.17 | /    |
| 117 | $\text{C}_3\text{H}_5\text{N}_2^+$ | Tl | Tl | 0.9  | 1.74 |

Table S8. The results of 5-fold Cross-validation for GBR models during the feature selection. The scores were evaluated by the Scikit-learn package.

|                       | 1     | 2     | 3     |
|-----------------------|-------|-------|-------|
| Score of first split  | 0.897 | 0.914 | 0.951 |
| Score of second split | 0.899 | 0.912 | 0.960 |
| Score of third split  | 0.894 | 0.913 | 0.963 |
| Score of forth split  | 0.902 | 0.903 | 0.979 |
| Score of fifth split  | 0.907 | 0.874 | 0.979 |
| Mean score            | 0.900 | 0.903 | 0.967 |
| Standard Deviation    | 0.004 | 0.015 | 0.011 |

Table S9. The results of 5-fold Cross-validation for GBR models after choosing 24 features. The scores were evaluated by the Scikit-learn package.

|                       | Model1 | Model2 | Model3 | Model4 | Model5 |
|-----------------------|--------|--------|--------|--------|--------|
| Score of first split  | 0.965  | 0.963  | 0.903  | 0.793  | 0.712  |
| Score of second split | 0.975  | 0.955  | 0.914  | 0.790  | 0.833  |
| Score of third split  | 0.985  | 0.945  | 0.903  | 0.730  | 0.750  |
| Score of forth split  | 0.945  | 0.972  | 0.890  | 0.764  | 0.720  |
| Score of fifth split  | 0.983  | 0.972  | 0.909  | 0.755  | 0.747  |
| Mean score            | 0.970  | 0.961  | 0.904  | 0.766  | 0.752  |
| Standard Deviation    | 0.014  | 0.010  | 0.008  | 0.024  | 0.043  |

Table S10. Comparison of PBE bandgaps calculated by CPU and GPU versions of VASP.

| Identification | A                           | B  | B' | CPU  | GPU  |
|----------------|-----------------------------|----|----|------|------|
| 1              | $\text{NH}_4^+$             | B  | Tl | 3.77 | 3.77 |
| 50             | $(\text{CH}_3)_4\text{N}^+$ | In | Tl | 2.00 | 2.00 |
| 100            | $\text{C}(\text{NH}_2)_3^+$ | Ge | Ba | 3.54 | 3.54 |
